# Supplementary material for: Infancy weight gain, parental socioeconomic position, and childhood overweight and obesity: a Danish register-based cohort study
Source: BMC Public Health. 2019 Sep 2;19:1209. doi: 10.1186/s12889-019-7537-z (PMC6720844; doi:10.1186/s12889-019-7537-z)
Supplement: Supplementary file 3 — Results from logistic regression models conducted on the population with complete data. A table showing the results obtained from the logistic regression models when these are based on the population with complete data. (DOCX 22 kb) [file 12889_2019_7537_MOESM3_ESM.docx]

Additional file title: *Additional file 3: Results from logistic regression models conducted on the population with complete data.*

|  | **Unadjusted model** | | **Intermediate model 1aa** | | **Intermediate model 1bb** | | **Adjusted model 2ac** | | **Adjusted model 2bd** | |
| --- | --- | --- | --- | --- | --- | --- | --- | --- | --- | --- |
|  | **OR** | **95% CI** | **OR** | **95% CI** | **OR** | **95% CI** | **OR** | **95% CI** | **OR** | **95% CI** |
| **Weight gain category** | | | | |  |  |  |  |  |  |
| Slow | 0.49 | 0.37-0.63 | 0.49 | 0.37-0.63 | 0.49 | 0.37-0.64 | 0.27 | 0.20-0.36 | 0.27 | 0.20-0.36 |
| Mean | 1 | - | 1 | - | 1 | - | 1 | - | 1 | - |
| Rapid | 2.25 | 1.90-2.67 | 2.25 | 1.90-2.67 | 2.24 | 1.89-2.65 | 3.08 | 2.57-3.70 | 3.08 | 2.57-3.69 |
| Very rapid | 4.02 | 3.42-4.73 | 4.06 | 3.45-4.78 | 4.01 | 3.41-4.72 | 7.14 | 5.94-8.60 | 7.12 | 5.93-8.58 |
| **Level of maternal education** | | | |  |  |  |  |  |  |  |
| ISCED 0-2 | 1.34 | 1.08-1.67 | 1.28 | 1.03-1.61 |  |  | 1.27 | 1.00-1.62 |  |  |
| ISCED 4 | 1.37 | 1.09-1.74 | 1.43 | 1.12-1.83 |  |  | 1.29 | 1.00-1.66 |  |  |
| ISCED 5-6 | 1.25 | 0.99-1.58 | 1.34 | 1.05-1.71 |  |  | 1.24 | 0.97-1.59 |  |  |
| ISCED 7-8 | 1 | - | 1 | - |  |  | 1 | - |  |  |
| **Household income** (quartiles) | | |  |  |  |  |  |  |  |  |
| Low | 1.45 | 1.21-1.75 |  |  | 1.33 | 1.09-1.61 |  |  | 1.39 | 1.13-1.72 |
| Low-middle | 1.21 | 1.00-1.46 |  |  | 1.20 | 0.99-1.46 |  |  | 1.21 | 0.98-1.48 |
| High-middle | 1.20 | 1.00-1.45 |  |  | 1.22 | 1.00-1.48 |  |  | 1.16 | 0.95-1.42 |
| High | 1 | - |  |  | 1 | - |  |  | 1 | - |
| **Child sex** | | | | |  |  |  |  |  |  |
| Male | 1 | - |  |  |  |  | 1 | - | 1 | - |
| Female | 0.85 | 0.75-0.97 |  |  |  |  | 0.88 | 0.77-1.01 | 0.88 | 0.77-1.01 |
| **Size for gestational age at birth** | | | | |  |  |  |  |  |  |
| SGA | 0.66 | 0.46-0.91 |  |  |  |  | 0.35 | 0.24-0.49 | 0.35 | 0.24-0.49 |
| AGA | 1 | - |  |  |  |  | 1 | - | 1 | - |
| LGA | 1.84 | 1.84-2.53 |  |  |  |  | 4.86 | 4.01-5.88 | 4.89 | 4.03-5.92 |
| **Parity** | | | | |  |  |  |  |  |  |
| 1 | 1.06 | 0.92-1.22 |  |  |  |  | 0.92 | 0.78-1.08 | 0.88 | 0.75-1.04 |
| 2 | 1 | - |  |  |  |  | 1 | - | 1 | - |
| >2 | 1.10 | 0.89-1.34 |  |  |  |  | 1.04 | 0.83-1.29 | 1.05 | 0.84-1.30 |
| **Gestational age at birth** | | | | |  |  |  |  |  |  |
| 37 weeks | 1.02 | 0.74-1.38 |  |  |  |  | 0.44 | 0.31-0.60 | 0.43 | 0.31-0.60 |
| 38 weeks | 0.89 | 0.72-1.10 |  |  |  |  | 0.55 | 0.44-0.69 | 0.55 | 0.44-0.69 |
| 39 weeks | 0.85 | 0.71-1.02 |  |  |  |  | 0.74 | 0.61-0.90 | 0.74 | 0.61-0.89 |
| 40 weeks | 1 | - |  |  |  |  | 1 | - | 1 | - |
| 41 weeks | 1.00 | 0.85-1.18 |  |  |  |  | 1.17 | 0.98-1.39 | 1.17 | 0.98-1.40 |
| **Maternal pre-pregnancy BMI** | | | | |  |  |  |  |  |  |
| Underweight | 0.40 | 0.22-0.66 |  |  |  |  | 0.43 | 0.24-0.71 | 0.42 | 0.23-0.70 |
| Normal weight | 1 | - |  |  |  |  | 1 | - | 1 | - |
| Overweight | 1.49 | 1.27-1.74 |  |  |  |  | 1.42 | 1.20-1.68 | 1.42 | 1.20-1.68 |
| Obesity I | 1.86 | 1.51-2.28 |  |  |  |  | 1.70 | 1.36-2.12 | 1.71 | 1.36-2.12 |
| Obesity II+III | 2.10 | 1.60-2.73 |  |  |  |  | 1.81 | 1.34-2.41 | 1.81 | 1.34-2.41 |
| **Gestational diabetes** | | | | |  |  |  |  |  |  |
| Yes | 1.40 | 1.09-1.80 |  |  |  |  | 1.35 | 0.96-1.88 | 1.36 | 0.96-1.88 |
| No | 1 | - |  |  |  |  | 1 | - | 1 | - |
| **Maternal smoking during pregnancy** | | | | |  |  |  |  |  |  |
| Yes | 1.41 | 1.10-1.79 |  |  |  |  | 1.14 | 0.87-1.48 | 1.08 | 0.82-1.41 |
| Stoppede | 1.64 | 1.21-2.20 |  |  |  |  | 1.47 | 1.06-2.01 | 1.42 | 1.02-1.94 |
| No | 1 | - |  |  |  |  | 1 | - | 1 | - |
| **Mode of delivery** | | | | |  |  |  |  |  |  |
| Caesarean | 0.97 | 0.82-1.14 |  |  |  |  | 0.92 | 0.76-1.10 | 0.93 | 0.77-1.11 |
| Vaginal | 1 | - |  |  |  |  | 1 | - | 1 | - |
| **Duration of breastfeeding** | | | | |  |  |  |  |  |  |
| 0-2 months | 1.19 | 1.02-1.39 |  |  |  |  | 0.88 | 0.74-1.04 | 0.87 | 0.74-1.03 |
| 2-4 months | 0.93 | 0.77-1.12 |  |  |  |  | 0.82 | 0.67-0.99 | 0.82 | 0.67-0.99 |
| 4-6 months | 1 | - |  |  |  |  | 1 | - | 1 | - |
| >6 months | 0.85 | 0.68-1.04 |  |  |  |  | 0.80 | 0.64-0.99 | 0.80 | 0.64-0.99 |

Additional file 3 legend: *Table presenting unadjusted and adjusted odds ratios (OR) and associated 95% confidence intervals (95% CI) of overweight and obesity in the complete case population (n=13 157). Abbreviations: ISCED (International Standard Classification of Education), SGA (Small-for-gestational age), AGA (Appropriate-for-gestational age), LGA (Large-for-gestational age). aAdjusted for maternal education and control variables (region, birth year and number of database registrations), bAdjusted for household income and control variables (region, birth year and number of database registrations), cAdjusted for maternal education, all covariates and control variables (region, birth year and number of database registrations), dAdjusted for household income, all covariates and control variables (region, birth year and number of database registrations), eStopped during pregnancy.*
